# Supplementary material
Source: PubMed Central journal article supplement (PMC4031316)
Supplement: NIHMS578668-supplement-1.pdf [file NIHMS578668-supplement-1.pdf]

## Supplemental Table I: Transplant Characteristics<sup>1</sup>

|                                     | All Transplants<br>N = 1532 |       | HLA-Matched<br>Total N = 856 |                              | HLA-Mismatched<br>Total N = 676 |                                  |
|-------------------------------------|-----------------------------|-------|------------------------------|------------------------------|---------------------------------|----------------------------------|
|                                     | N                           |       | N                            | Percentage of<br>HLA-Matched | N                               | Percentage of<br>HLA- Mismatched |
| <b>Age</b>                          |                             |       |                              |                              |                                 |                                  |
| Min                                 |                             | 0.6   |                              | 0.6                          |                                 | 0.9                              |
| Max                                 |                             | 70    |                              | 70                           |                                 | 66                               |
| Median                              |                             | 38    |                              | 40                           |                                 | 35                               |
| <b>Race</b>                         |                             |       |                              |                              |                                 |                                  |
| Caucasian                           | 1412                        | 92.2% | 806                          | 94.2%                        | 606                             | 90.0%                            |
| Non-Caucasian                       | 98                          | 6.4%  | 34                           | 4.0%                         | 64                              | 9.5%                             |
| Unknown                             | 8                           | 0.5%  | 6                            | 0.7%                         | 2                               | 0.3%                             |
| Missing                             | 14                          | 0.9%  | 10                           | 1.2%                         | 4                               | 0.6%                             |
| <b>Karnofsky Score</b>              |                             |       |                              |                              |                                 |                                  |
| 90-100                              | 958                         | 62.5% | 542                          | 63.3%                        | 416                             | 61.5%                            |
| 10-80                               | 441                         | 28.8% | 230                          | 26.9%                        | 211                             | 31.2%                            |
| Unknown                             | 133                         | 8.7%  | 84                           | 9.8%                         | 49                              | 7.3%                             |
| <b>Disease Status at Transplant</b> |                             |       |                              |                              |                                 |                                  |
| Early                               | 667                         | 43.5% | 430                          | 50.2%                        | 237                             | 35.1%                            |
| Intermediate                        | 355                         | 23.2% | 170                          | 19.9%                        | 185                             | 27.4%                            |
| Advanced                            | 492                         | 32.1% | 245                          | 28.6%                        | 247                             | 36.5%                            |
| Other                               | 10                          | 0.7%  | 7                            | 0.8%                         | 3                               | 0.4%                             |
| Unknown                             | 8                           | 0.5%  | 4                            | 0.5%                         | 4                               | 0.6%                             |
| <b>Cytogenetic Disease Risk</b>     |                             |       |                              |                              |                                 |                                  |
| Low                                 | 269                         | 17.6% | 146                          | 17.1%                        | 123                             | 18.2%                            |
| Intermediate                        | 680                         | 44.4% | 385                          | 45.0%                        | 295                             | 43.6%                            |
| High                                | 130                         | 8.5%  | 67                           | 7.8%                         | 63                              | 9.3%                             |
| Unknown                             | 453                         | 29.6% | 258                          | 30.1%                        | 195                             | 28.9%                            |
| <b>CMV Serostatus</b>               |                             |       |                              |                              |                                 |                                  |
| Donor-/Recipient -                  | 487                         | 31.8% | 291                          | 33.3%                        | 202                             | 29.9%                            |

|                                          |     |       |     |       |     |       |
|------------------------------------------|-----|-------|-----|-------|-----|-------|
| Donor+/Recipient -                       | 193 | 12.6% | 105 | 12.2% | 89  | 13.2% |
| Donor-/Recipient+                        | 483 | 31.5% | 288 | 33.3% | 198 | 29.3% |
| Donor+/Recipient+                        | 321 | 20.1% | 157 | 18.3% | 164 | 24.3% |
| Unknown                                  | 48  | 3.1%  | 25  | 2.9%  | 23  | 3.4%  |
| <hr/>                                    |     |       |     |       |     |       |
| <b>Graft type</b>                        |     |       |     |       |     |       |
| Bone Marrow                              | 810 | 52.9% | 410 | 47.9% | 400 | 59.2% |
| Peripheral Blood<br>Stem Cells<br>(PBSC) | 722 | 47.1% | 446 | 52.1% | 276 | 40.8% |

<sup>1</sup> Important clinical and demographic factors are shown for all transplants, HLA-matched and HLA-mismatched groups.

## Supplemental Table II: Transplant HLA Matching<sup>2</sup>

|                                                                      | All Transplants<br>N = 1532 |       | HLA-Matched<br>Total N = 856 |                           | HLA-Mismatched<br>Total N = 676 |                                 |
|----------------------------------------------------------------------|-----------------------------|-------|------------------------------|---------------------------|---------------------------------|---------------------------------|
|                                                                      | N                           |       | N                            | Percentage of HLA-Matched | N                               | Percentage of<br>HLA-Mismatched |
| <b>Donor: Recipient<br/>match for HLA-A, B,<br/>C, DRB1 and DQB1</b> |                             |       |                              |                           |                                 |                                 |
| 10/10 allele matched                                                 | 856                         | 55.6% | 856                          | 100%                      |                                 | ---                             |
| 9/10                                                                 | 418                         | 27.3% | ---                          | ---                       |                                 | 61.8%                           |
| 8/10                                                                 | 173                         | 11.3% | ---                          | ---                       |                                 | 25.6%                           |
| <8/10                                                                | 85                          | 5.6%  | ---                          | ---                       |                                 | 12.6%                           |
| <hr/>                                                                |                             |       |                              |                           |                                 |                                 |
| <b>HLA MM Detail All</b>                                             | --                          | ---   | --                           | ---                       |                                 |                                 |
| MM at A                                                              | --                          | ---   | --                           | ---                       | 219                             | 32.4%                           |
| MM at B                                                              | --                          | ---   | --                           | ---                       | 189                             | 28.0%                           |
| MM at C                                                              | --                          | ---   | --                           | ---                       | 357                             | 52.8%                           |
| MM at DRB1                                                           | --                          | ---   | --                           | ---                       | 73                              | 10.8%                           |
| MM at DQB1                                                           | --                          | ---   | --                           | ---                       | 163                             | 24.1%                           |
| <hr/>                                                                |                             |       |                              |                           |                                 |                                 |
| <b>HLA MM Detail for 9/10</b>                                        | --                          | ---   | --                           | ---                       |                                 | % of 9/10 MM<br>Transplants     |
| MM at A                                                              | --                          | ---   | --                           | ---                       | 119                             | 27.7%                           |
| MM at B                                                              | --                          | ---   | --                           | ---                       | 50                              | 11.7%                           |
| MM at C                                                              | --                          | ---   | --                           | ---                       | 169                             | 39.4%                           |
| MM at DRB1                                                           | --                          | ---   | --                           | ---                       | 19                              | 4.4%                            |
| MM at DQB1                                                           | --                          | ---   | --                           | ---                       | 61                              | 14.2%                           |

|                                   |     |       |     |       |     |                           |
|-----------------------------------|-----|-------|-----|-------|-----|---------------------------|
| <b>HLA MM Detail for 8/10</b>     | --  | ---   | --  | ---   |     | % of 8/10 MM Transplants  |
| MM at A                           | --  | ---   | --  | ---   | 60  | 18.0%                     |
| MM at B                           | --  | ---   | --  | ---   | 78  | 23.4%                     |
| MM at C                           | --  | ---   | --  | ---   | 107 | 32.0%                     |
| MM at DRB1                        | --  | ---   | --  | ---   | 33  | 9.9%                      |
| MM at DQB1                        | --  | ---   | --  | ---   | 56  | 16.8%                     |
| <b>HLA MM Detail for &lt;8/10</b> | --  | ---   | --  | ---   |     | % of <8/10 MM Transplants |
| MM at A                           | --  | ---   | --  | ---   | 40  | 16.1%                     |
| MM at B                           | --  | ---   | --  | ---   | 61  | 24.5%                     |
| MM at C                           | --  | ---   | --  | ---   | 81  | 32.5%                     |
| MM at DRB1                        | --  | ---   | --  | ---   | 21  | 8.4%                      |
| MM at DQB1                        | --  | ---   | --  | ---   | 46  | 18.5%                     |
| <b>HLA C MM Detail</b>            |     |       |     |       |     |                           |
| D C1/C1 into R C1/C1              | 579 | 37.8% | 372 | 42.9% | 207 | 30.6%                     |
| D C1/C1 into R C1/C2              | 51  | 3.3%  | 0   | ---   | 51  | 7.5%                      |
| D C1/C1 into R C2/C2              | 7   | 0.5%  | 0   | ---   | 7   | 1.0%                      |
| D C2/C2 into R C1/C1              | 2   | 0.1%  | 0   | --    | 2   | 0.3%                      |
| D C2/C2 into R C1/C2              | 32  | 2.1%  | 0   | ---   | 32  | 4.7%                      |
| D C2/C2 into R C2/C2              | 188 | 12.3% | 118 | 13.6% | 70  | 10.4%                     |
| D C1/C2 into R C1/C1              | 66  | 4.3%  | 0   | ---   | 66  | 9.8%                      |
| D C1/C2 into R C1/C2              | 572 | 37.3% | 366 | 42.2% | 206 | 30.5%                     |
| D C1/C2 into R C2/C2              | 35  | 2.3%  | 0   | ---   | 35  | 5.2%                      |

<sup>2</sup> Distribution of class I and class II HLA matching for all transplants, HLA-matched and HLA-mismatched groups.
